# Supplementary material
Source: PubMed Central journal article supplement (PMC4874866)
Supplement: NIHMS744092-supplement-Supplemental_Data_File___doc___tif__pdf__etc___1.pdf [file NIHMS744092-supplement-Supplemental_Data_File___doc___tif__pdf__etc___1.pdf]

Supplemental table 1. Characteristics of CARDIA women with detailed reproductive histories and measures of high sensitivity C-reactive protein at year 25 according to prevalent hypertension status

| Characteristics                             | Prevalent hypertension |              | p-value |
|---------------------------------------------|------------------------|--------------|---------|
|                                             | Yes<br>n=586           | No<br>n=1039 |         |
| Age, years                                  | 50.6 (3.5)             | 50.0 (3.7)   | 0.001   |
| Black race, %                               | 70.5                   | 35.4         | < 0.001 |
| Years of schooling                          | 14.4 (2.5)             | 15.6 (2.5)   | < 0.001 |
| Current cigarette smoking, %                | 18.3                   | 12.7         | 0.002   |
| Current alcohol use, %                      | 69.3                   | 80.6         | <0.0001 |
| Physical activity, %                        |                        |              | < 0.001 |
| ≤ 100 exercise units                        | 35.7                   | 20.1         |         |
| 100.1 - 222.0 exercise units                | 25.3                   | 24.5         |         |
| 222.1 - 408.0 exercise units                | 22.9                   | 25.9         |         |
| >408.0 exercise units                       | 16.2                   | 29.6         |         |
| Grand multiparity (5 or more births), %     | 3.6                    | 1.9          | 0.04    |
| Menopause stage, %                          |                        |              | < 0.001 |
| Premenopause                                | 13.0                   | 21.1         |         |
| Perimenopause                               | 45.9                   | 42.6         |         |
| Post menopause                              | 41.1                   | 36.3         |         |
| Cholesterol lowering medicine use, %        | 27.1                   | 6.6          | < 0.001 |
| Diabetes mellitus, %                        | 22.2                   | 4.0          | < 0.001 |
| High density lipoprotein cholesterol, mg/dl | 60.2 (18.2)            | 64.1 (18.0)  | < 0.001 |
| Total cholesterol, mg/dl                    | 191.4 (39.1)           | 194.9 (35.5) | 0.061   |
| Body mass index, kg/m <sup>2</sup>          | 34.4 (8.6)             | 28.7 (7.0)   | < 0.001 |
| Waist circumference, cm                     | 99.2 (16.9)            | 86.7 (14.4)  | < 0.001 |
| High sensitivity C-reactive protein*, µg/ml | 2.9 (3.7)              | 1.3 (3.4)    | < 0.001 |

Values are expressed as means (SD) unless otherwise indicated; *p*-values were determined using chi-squared test for categorical variables and 2-sample T-test for continuous variables. \*Values are geometric means. Hs-CRP was measured in microgram/ml. Exercise units, refers to a weighted sum, based on the intensity of activity and the number of months of less frequent participation, plus three times the number the number of months of “frequent participation”<sup>14</sup>.
