# Supplementary material
Source: PubMed Central journal article supplement (PMC4874866)
Supplement: NIHMS744092-supplement-Supplemental_Data_File___doc___tif__pdf__etc___2.pdf [file NIHMS744092-supplement-Supplemental_Data_File___doc___tif__pdf__etc___2.pdf]

Supplementary Table 2. Odd ratios of hypertension associated with doubling (100% increase in) high sensitivity C-reactive protein levels in CARDIA women at year 25

|                | <b>Odd ratios</b> | <b>95% CI</b> | <b>p-value</b> |
|----------------|-------------------|---------------|----------------|
| <b>Model 1</b> | 1.43              | 1.35 - 1.52   | <0.001         |
| <b>Model 2</b> | 1.32              | 1.24 - 1.41   | <0.001         |
| <b>Model 3</b> | 1.28              | 1.20 - 1.37   | <0.001         |
| <b>Model 4</b> | 1.26              | 1.18 - 1.36   | <0.001         |
| <b>Model 5</b> | 1.14              | 1.05 - 1.24   | 0.002          |
| <b>Model 6</b> | 1.14              | 1.05 - 1.24   | 0.002          |

Model 1: Unadjusted analysis

Model 2: Model 1 adjusted for age and race

Model 3: Model 2 plus years of schooling, smoking, physical activity, alcohol use and center

Model 4: Model 3 plus total cholesterol, high density lipoprotein-cholesterol, diabetes, cholesterol lowering medication use and parity

Model 5: Model 4 plus body mass index

Model 6: Model 5 plus menopausal stage

Hs-CRP was measured in microgram/ml.
